# Supplementary material for: Integrated Multi-Omics Analyses Reveal the Molecular Basis of Tryptophol Over-Accumulation in Saccharomyces Cerevisiae
Source: Research Square preprint supplement (doi:10.21203/rs.3.rs-108779/v1), 2020-11-19
Supplement: Supplementary file 1 [file 9154ba3d84366bd8e3f58563.docx]

**Table S3 Summary of transcriptome sequencing for RNA-seq libraries**

| Sample | Raw reads | Clean reads　(ratio) | rRNA mapped reads (ratio) | Non-rRNA mapped reads (ratio) | CDSs mapped reads (ratio) |
| --- | --- | --- | --- | --- | --- |
| TM_1 | 83810792 | 83677440 (99.84%) | 8114404 (9.70%) | 72263275 (86.36%) | 66181293 (79.09%) |
| TM_2 | 89583074 | 89449834 (99.85%) | 6512962 (7.28%) | 79374807 (88.74%) | 72667478 (81.24%) |
| TM_3 | 73178632 | 73061096 (99.84%) | 5298738 (7.25%) | 64733843 (88.6%) | 59154042 (80.97%) |
| TM-06T_1 | 49498250 | 49433562 (99.87%) | 4904416 (9.92%) | 42160556 (85.29%) | 37965987 (76.8%) |
| TM-06T_2 | 55946398 | 55846792 (99.82%) | 5175174 (9.27%) | 46057199 (82.47%) | 41282869 (73.92%) |
| TM-06T_3 | 76279708 | 76155140 (99.84%) | 6927252 (9.10%) | 65774337 (86.37%) | 59411908 (78.01%) |
| TM-15T_1 | 37221862 | 37183238 (99.90%) | 11599214 (31.19%) | 22021957 (59.23%) | 18389038 (49.46%) |
| TM-15T_2 | 40774756 | 40735734 (99.90%) | 11040024 (27.10%) | 26701980 (65.55%) | 23324692 (57.26%) |
| TM-15T_3 | 39001552 | 38974550 (99.93%) | 12098406 (31.04%) | 23477634 (60.24%) | 19561095 (50.19%) |
| TM-TP _1 | 41207806 | 41174566 (99.92%) | 12582620 (30.56%) | 24707908 (60.01%) | 20006324 (48.59%) |
| TM-TP_2 | 40659718 | 40624366 (99.91%) | 12373844 (30.46%) | 25470072 (62.7%) | 21683236 (53.37%) |
| TM-TP_3 | 36648316 | 36623732 (99.93%) | 11711766 (31.98%) | 21153591 (57.76%) | 16734701 (45.69%) |
